# Supplementary material
Source: MDPI journal article supplement (https://www.mdpi.com/2075-4701/13/3/615)
Supplement: s1 [file s1]

## Article

# Characteristics for Gallium-Based Liquid Alloys of Low Melting Temperature

Jianfei Shentu <sup>1</sup>, Jiatong Pan <sup>1</sup>, Hao Chen <sup>1</sup>, Chunlin He <sup>1</sup>, Youbin Wang <sup>1</sup>, Gjergj Dodbiba <sup>2</sup> and Toyohisa Fujita <sup>1,\*</sup>

<sup>1</sup> College of Resources, Environment and Materials, Guangxi University, Nanning 530004, China

<sup>2</sup> Graduate School of Engineering, The University of Tokyo, Bunkyo 113-8656, Japan

\* Correspondence: fujitatoyohisa@gxu.edu.cn; Tel. +86-1479-5734-1009

## Supplementary information

**Table S1.** The viscosity of gallium-based alloys by capillary method at 20°C.

| Alloy                                                                               | Kinematic viscosity (mm <sup>2</sup> /s) | Density (g/ml) | Dynamic viscosity (mPa·s) |
|-------------------------------------------------------------------------------------|------------------------------------------|----------------|---------------------------|
| Ga <sub>80</sub> In <sub>10</sub> Sn <sub>10</sub>                                  | 0.470                                    | 6.72           | 3.16                      |
| Ga <sub>80</sub> In <sub>15</sub> Sn <sub>5</sub>                                   | 0.427                                    | 6.75           | 2.88                      |
| Ga <sub>80</sub> In <sub>5</sub> Sn <sub>15</sub>                                   | 0.417                                    | 6.60           | 2.75                      |
| Ga <sub>80</sub> In <sub>12.5</sub> Sn <sub>7.5</sub>                               | 0.449                                    | 6.76           | 3.04                      |
| Ga <sub>80</sub> In <sub>7.5</sub> Sn <sub>12.5</sub>                               | 0.439                                    | 6.68           | 2.93                      |
| Galinstan (Ga <sub>68.5</sub> In <sub>21.5</sub> Sn <sub>10</sub> )                 | 0.464                                    | 6.49           | 3.01                      |
| (Ga <sub>80</sub> In <sub>10</sub> Sn <sub>10</sub> ) <sub>97</sub> Zn <sub>3</sub> | 0.497                                    | 6.79           | 3.37                      |
